# Supplementary material for: Synthesis and sensing applications of a new fluorescent derivative of cholesterol
Source: Royal Society of Chemistry journal article supplement (doi:10.1039/c5nj02601f), 2015-12-09
Supplement: c5nj02601f1.pdf [file c5nj02601f1.pdf]

**Supporting Information**  
*for*  
**Synthesis and Sensing Applications of A New Fluorescent  
Derivative of Cholesterol**

Yanchao Lü, Qingqing Sun, Baolong Hu, Xiangli Chen, Rong Miao\* and Yu Fang\*

Key Laboratory of Applied Surface and Colloid Chemistry, Ministry of Education, School of Chemistry and

Chemical Engineering, Shaanxi Normal University, Xi'an 710119, P. R. China

---

\* Corresponding author, E-mail: yfang@snnu.edu.cn (Yu Fang); Tel: 0086-29-81530786; Fax: 0086-29-81530787.

\* Corresponding author, E-mail: miaorong2015@snnu.edu.cn (Rong Miao)

## Experimental

### Synthesis of I-1

To a solution of diethanolamine (5.00 g, 48 mmol) in  $\text{CHCl}_3$  (50 mL),  $\text{SOCl}_2$  (190 mmol, 14 mL) in  $\text{CHCl}_3$  (40 mL) was added dropwise at 0 °C. Then, the mixture was stirred at room temperature for 3 h, and then further refluxed for 4 h. After evaporation of the excessive  $\text{SOCl}_2$ , the residue was purified by crystallization from ethanol to give 6.0 g (70%) of compound **1** as a white solid.

### Synthesis of I-2

To a stirred solution of compound **1** (0.63 g, 3.5 mmol) and TEA (1500  $\mu\text{L}$ , 10.5 mmol) in  $\text{CHCl}_3$  (20 mL), cholesterol chloroformate (1.57 g, 3.5 mmol) in  $\text{CHCl}_3$  (15 mL) was added dropwise at 0 °C for 3 h, and the mixture was stirred for 5 h at room temperature. Then, the reaction mixture was washed with 0.01 mol/L hydrochloric acid (50 mL  $\times$  3) and pure water (50 mL  $\times$  3), respectively. The organic layer was separated and filtered through a pad of anhydrous  $\text{MgSO}_4$ . After evaporating the excessive  $\text{CHCl}_3$ , the residue was purified by crystallization from ethanol to give 1.75 g (90%) of compound **2** as a white solid with m.p. 111.7–112.0 °C.  $^1\text{H}$  NMR (( $\delta$  ppm, 400 MHz,  $\text{CDCl}_3$ ): 5.38 (s, 1H), 4.50–4.58 (m, 1H), 3.63–3.67 (m, 8H), 0.68–2.40 (m, 43H).  $^{13}\text{C}$ -NMR (101 MHz,  $\text{CDCl}_3$ )  $\delta$ = 155.31, 155.29, 139.53, 122.74, 76.73, 75.53, 56.68, 56.15, 50.01, 42.31, 41.93, 39.73, 39.52, 38.52, 36.97, 36.56, 36.19, 35.79, 31.91, 31.87, 28.23, 28.18, 28.00, 24.29, 23.85, 22.82, 22.57, 21.06, 19.36, 19.25, 18.72, 11.86. MS (ESI, m/z): Calcd for [(M+H) $^+$ ]: 554.3453, Found: 554.3450.

### Synthesis of I-3

Compound **2** (1.00 g, 1.80 mmol) was dissolved in DMF (10 mL). The solution was stirred and  $\text{NaN}_3$  (0.12 g, 1.80 mmol) was added. The mixture was stirred at 85 °C for 48 h, then the mixture was poured into water (20 mL), and then filtered. Finally, the filtrate was washed with  $\text{CHCl}_3$  (20 mL  $\times$  3) and dried in vacuum to give compound **3** as canary powder, and then purified by silica gel chromatography (3:1 DCM/petroleum ether) to afford compound **3** (0.35g, 35%) as a white solid with m.p. 88.2–89.2 °C.  $^1\text{H}$  NMR (( $\delta$  ppm, 400 MHz,  $\text{CDCl}_3$ ): 5.39 (s, 1H), 4.53–4.58 (m, 1H), 3.44–3.51 (m, 8H), 0.68–2.40 (m, 43H). IR (KBr,  $\text{cm}^{-1}$ ): 2982, 2772, 2110, 1745. MS

(ESI, m/z): Calcd for [(M+H)<sup>+</sup>]: 561.3857, Found: 561.3821.

#### Synthesis of I-4

CuSO<sub>4</sub> (0.19 g, 1.18 mmol) and sodium ascorbate (0.29 g, 1.48 mmol) were added to a solution of compound 3 (0.83 g, 1.48 mmol) and compound 7 (0.69 g, 1.48 mmol) in THF/H<sub>2</sub>O (1:1) 32 mL. The mixture was stirred at room temperature for 18 h, and then filtered. The THF was removed under vacuum. The organic phase was washed with CHCl<sub>3</sub> and dried (Na<sub>2</sub>SO<sub>4</sub>). The residue was purified by silica gel chromatography (2:1 EtOAc /methanol) to afford compound 5 (1.11g, 73%) as a white solid with m.p. 165.3-166.6 °C. <sup>1</sup>H NMR ((δ ppm, 400 MHz, CDCl<sub>3</sub>): 7.54 (s, 1H), 5.38-5.39 (t, 2H), 5.24 (s, 1H), 4.42-4.56 (m, 6H), 3.25-3.80 (m, 6H), 0.68-2.36 (m, 86H). IR (KBr, cm<sup>-1</sup>): 2982, 2772, 1745. MS (ESI, m/z): Calcd for [(M+H)<sup>+</sup>]: 1028.7620, Found: 1028.7651.

#### Synthesis of I-5

The synthetic procedures for compound 5 are similar to those for compound 3. The crude product was dried in vacuum to give a canary powder, and then purified by silica gel chromatography (2:1 EtOAc/petroleum ether) to afford compound 5 (0.38 g, 90%) as a white solid with m.p. 134.9-135.1 °C. <sup>1</sup>H NMR ((δ ppm, 400 MHz, CDCl<sub>3</sub>): 7.53 (s, 1H), 5.37-5.40 (t, 2H), 5.22 (s, 1H), 4.42-4.56 (m, 6H), 3.11-3.77 (m, 6H), 0.67-2.41 (m, 86H). <sup>13</sup>C-NMR (101 MHz, CDCl<sub>3</sub>) δ= 139.81, 139.50, 122.97, 122.66, 76.80, 75.87, 74.86, 56.81, 56.78, 56.27, 50.14, 50.10, 42.41, 39.84, 39.61, 38.63, 38.56, 37.10, 37.04, 36.64, 36.29, 35.89, 32.00, 31.96, 28.32, 28.25, 28.09, 24.38, 23.94, 22.90, 22.65, 21.17, 21.14, 19.46, 19.40, 18.82, 18.81, 11.96, 11.95. IR (KBr, cm<sup>-1</sup>): 2982, 2772, 2110, 1745. MS (ESI, m/z): Calcd for [(M+H)<sup>+</sup>]: 1034.8024, Found: 1034.7998.

#### Synthesis of I-6

To a stirred solution 4-Chloro-7-nitro-1,2,3-benzoxadiazole of (1.42 g, 7.14 mmol) in EtOAc (50 mL), propargylamine (500 μL, 7.14 mmol) was added dropwise, and the mixture was stirred for 5 h at room temperature, and then filtered. The crude product was dried in vacuum to give a crimson powder, and then purified by silica gel chromatography (DCM) to afford orange powder (1.38 g, 89%) with m.p. 84.9-85.8

°C. <sup>1</sup>H NMR ((δ ppm, 400 MHz, CDCl<sub>3</sub>): 8.51 (d, 1H), 6.35-6.37 (d, 2H), 4.31 (d, 2H), 2.48 (d, 1H), IR (KBr, cm<sup>-1</sup>): 3474, 3210, 2110, 1672. MS (ESI, m/z): Calcd for [(M+H)<sup>+</sup>]: 218.0440, Found: 218.0401

### Synthesis of I-7

To a stirred solution of propargylamine (500 μL, 7.14 mmol) and TEA (2.00 mL, 14.29 mmol) in DCM (40 mL), cholesterol chloroformate (3.21 g, 7.14 mmol) in DCM (20 mL) was added dropwise at 0 °C for 3 h, and the mixture was stirred for 5 h at room temperature, and then filtered. Finally, the filtrate was washed with 0.01 mol/L hydrochloric acid (50 mL × 3) and pure water (50 mL × 3), respectively. The organic phase was dried with Na<sub>2</sub>SO<sub>4</sub>. The crude product was purified by silica gel chromatography (DCM) to afford compound 7 (2.67 g, 80%) as a white solid with m.p. 108.1-108.5 °C. <sup>1</sup>H NMR ((δ ppm, 400 MHz, CDCl<sub>3</sub>): 5.38 (s, 1H), 4.93 (s, 1H, -NH), 4.45-4.60 (m, 1H), 3.97 (s, 2H), 0.68-2.36 (m, 43H). <sup>13</sup>C-NMR (101 MHz, CDCl<sub>3</sub>) δ= 155.57, 139.70, 122.62, 79.86, 74.95, 71.46, 56.70, 56.16, 50.02, 42.33, 39.75, 39.53, 38.49, 36.97, 36.56, 36.20, 35.81, 31.91, 31.88, 30.69, 28.24, 28.12, 28.02, 24.29, 23.85, 22.82, 22.57, 21.05, 19.33, 18.73, 11.87. MS (ESI, m/z): Calcd for [(M+H)<sup>+</sup>]: 467.3763, Found: 467.3761.

### Synthesis of CTN

The synthetic procedures for CTN are similar to those for compound 4. The residue was purified by silica gel chromatography (2:1 THF/petroleum ether) to afford the target compound CTN(0.35g, 50%) as a white solid with m.p. 145.0-146.0 °C. <sup>1</sup>H NMR ((δ ppm, 400 MHz, CDCl<sub>3</sub>): 8.34-8.35 (d, 2H), 7.87 (s, 1H), 7.56 (s, 1H), 6.36 (s, 1H), 5.69 (s, 1H), 5.30 (s, 2H), 4.86 (s, 2H), 4.41 (s, 8H), 0.67-2.45 (m, 86H). <sup>13</sup>C-NMR (101 MHz, CDCl<sub>3</sub>) δ= 155.45, 144.35, 143.89, 139.68, 139.20, 136.43, 123.04, 76.72, 76.09, 56.70, 56.66, 56.20, 50.03, 49.97, 42.32, 39.74, 39.72, 39.52, 38.54, 38.45, 36.99, 36.89, 36.56, 36.52, 36.21, 35.81, 31.90, 31.86, 31.82, 28.23, 28.15, 28.09, 28.02, 24.28, 23.89, 22.82, 22.57, 21.06, 19.34, 19.32, 18.75, 18.73, 11.87. IR (KBr, cm<sup>-1</sup>): 2982, 2959, 1672. MS (ESI, m/z): Calcd for [(M+H)<sup>+</sup>]: 1252.8464, Found: 1252.8460.

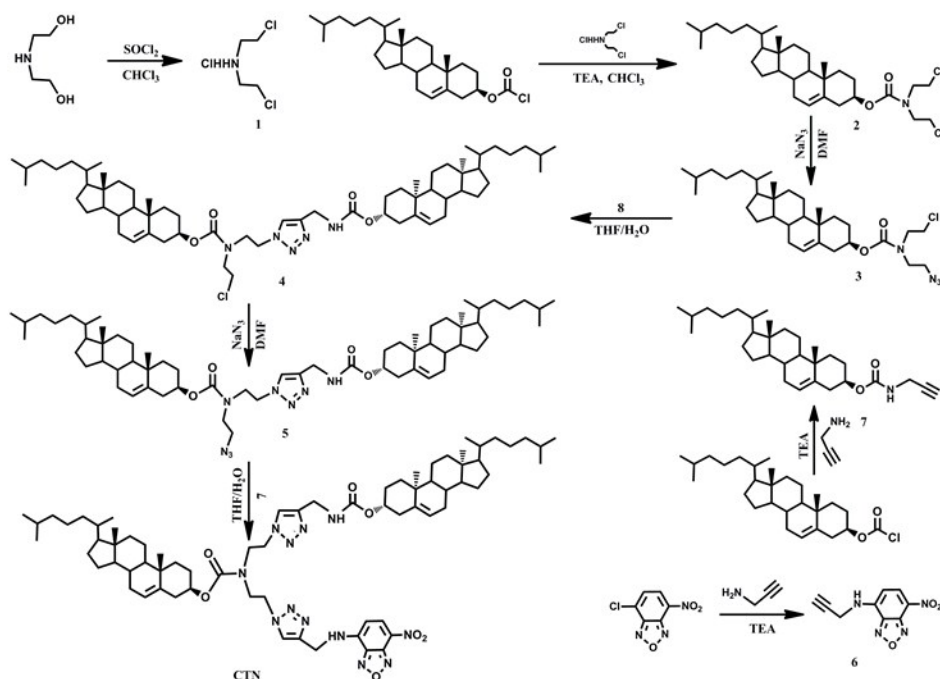

Scheme S1. Schematic representation of the synthesis route of compound CTN.

## Determination of Detection Limit

### Detection Limit of the CTN sensing system to $\text{Hg}^{2+}$ and CTN- $\text{Hg}^{2+}$ to OPs.

The detection limit (DL) of sensing system was determined according to the following equations:

$$S_b = \sqrt{\frac{\sum_{i=1}^n (x_i - \bar{x})^2}{n-1}} \quad (1)$$

$$S = \frac{\Delta I}{\Delta c} \quad (2)$$

$$DL = \frac{3S_b}{S} \quad (3)$$

The standard deviation ( $S_b$ ) regarding present system of the aqueous solution of CTN sensing system and the instrument was determined by measuring the fluorescence intensities ( $x_i$ ) of the solution for more than 10 times, and calculating the corresponding average intensity ( $\bar{x}$ ) firstly. By fitting the intensity data and the average intensity as obtained into equation 1, the value of the standard deviation ( $S_b$ )

was obtained.

Then, a certain amount of  $\text{Hg}^{2+}$  ion was added into the ethanol solution of CTN, and then the fluorescence emission intensities were recorded. Corresponding variations in intensity ( $\Delta I$ ) and those in phenol concentration ( $\Delta c$ ) were calculated. By fitting the data into equation 2,  $S$  value for the present system was obtained. Finally, with the values of  $S_b$  and  $S$  as determined, the DL for the system was calculated according to equation 3.

The detection limit (DL) of CTN- $\text{Hg}^{2+}$  sensing system to OPs according to the same method.

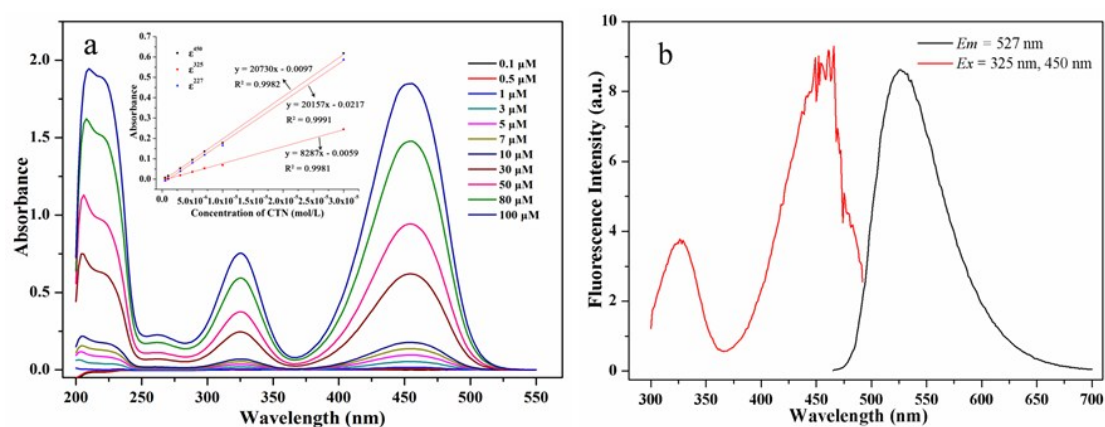

**Fig. S1** (a) UV-vis absorption spectra of the ethanol solution of CTN recorded at different concentrations. Inset: The plots of UV-vis absorption of CTN in ethanol as a function of the fluorophore concentration. (b) Steady-state fluorescence excitation and emission spectra of CTN in ethanol.

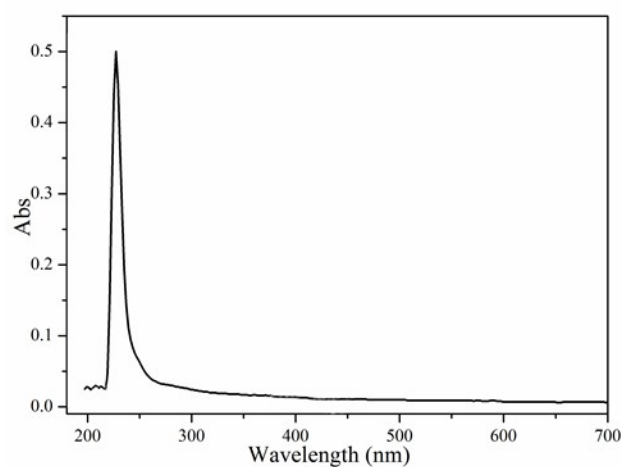

**Fig. S2** UV-vis absorption spectra of intermediate 4 in DCM solution ( $1 \times 10^{-5}$  mol/L).

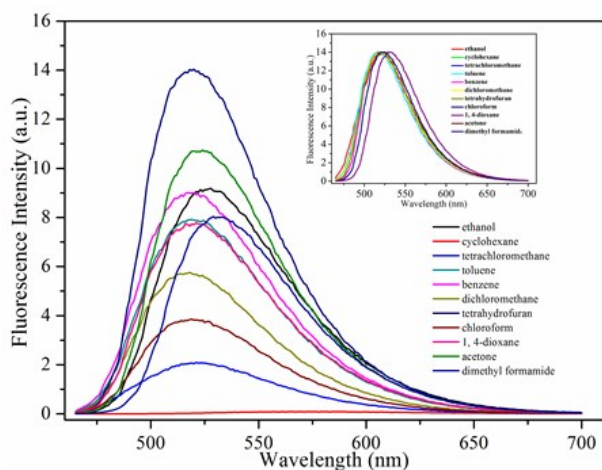

**Fig. S3** Fluorescence emission spectra of CTN recorded in its solutions of different solvents at a concentration of  $1 \times 10^{-5}$  mol/L ( $\lambda_{\text{ex}} = 450$  nm).

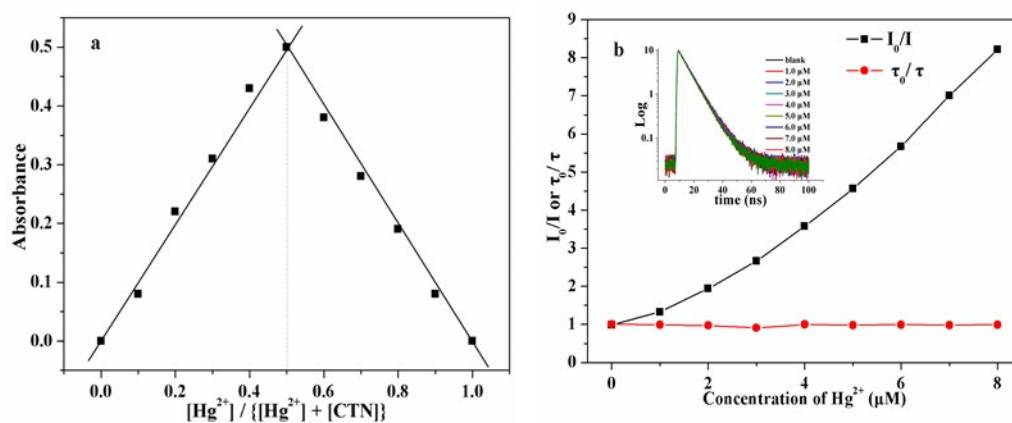

**Fig. S4** (a) Job's plot for 1 : 1 complex of CTN probe and  $\text{Hg}^{2+}$  ion at 450 nm in EtOH/ $\text{H}_2\text{O}$  ( $v/v=10:1$ , 10 mM HEPES buffer, pH 7.4) solution; (b) Stern-Volmer plots of  $I_0/I$  and  $\tau_0/\tau$  against the concentration of  $\text{Hg}^{2+}$  ( $\lambda_{\text{ex}}/\lambda_{\text{em}} = 450/527$  nm).

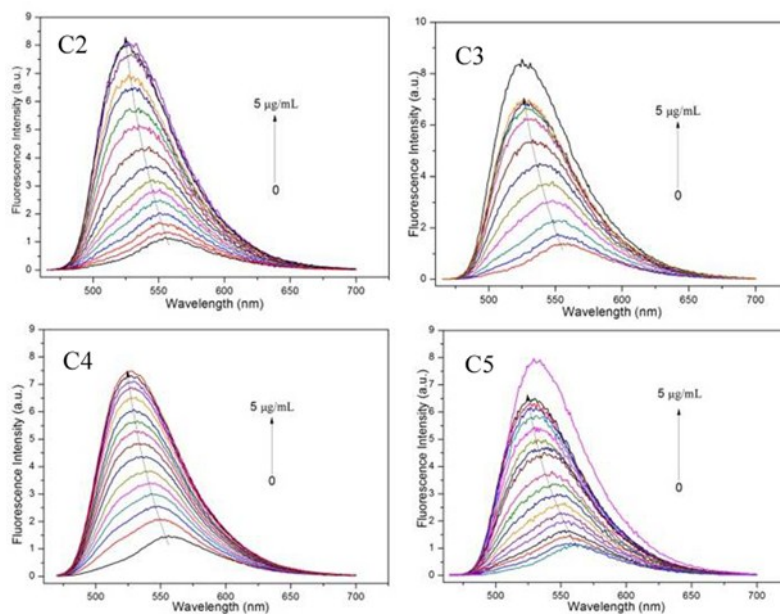

**Fig. S5** Fluorescence emission intensity changes of CTN- $\text{Hg}^{2+}$  sensing system in EtOH/ $\text{H}_2\text{O}$  ( $v/v=10:1$ , 10 mM HEPES buffer, pH 7.4) with 0–5  $\mu\text{g}/\text{mL}$  addition of analyte.

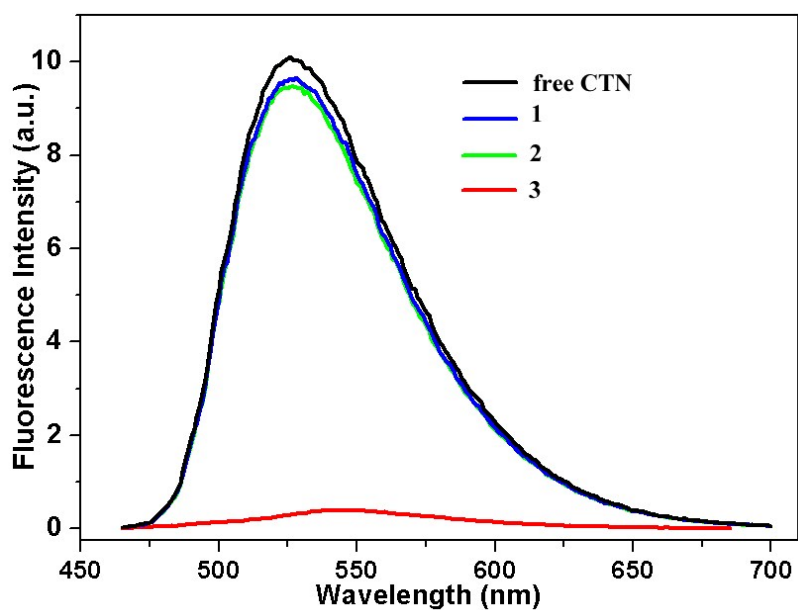

**Fig. S6** Fluorescence emission changes of CTN (10  $\mu$ M) sensing system in EtOH/H<sub>2</sub>O (v/v=10:1, 10 mM HEPES buffer, pH 7.4) upon addition of 1.0 equivalent of OPs, then 1.0 equivalent of Hg<sup>2+</sup>, and then another 2.0 equivalent of Hg<sup>2+</sup>. Note: 1-CTN + OPs, 2-1 + Hg<sup>2+</sup> (1.0 equiv.), 3-2 + Hg<sup>2+</sup> (1.0 equiv.).

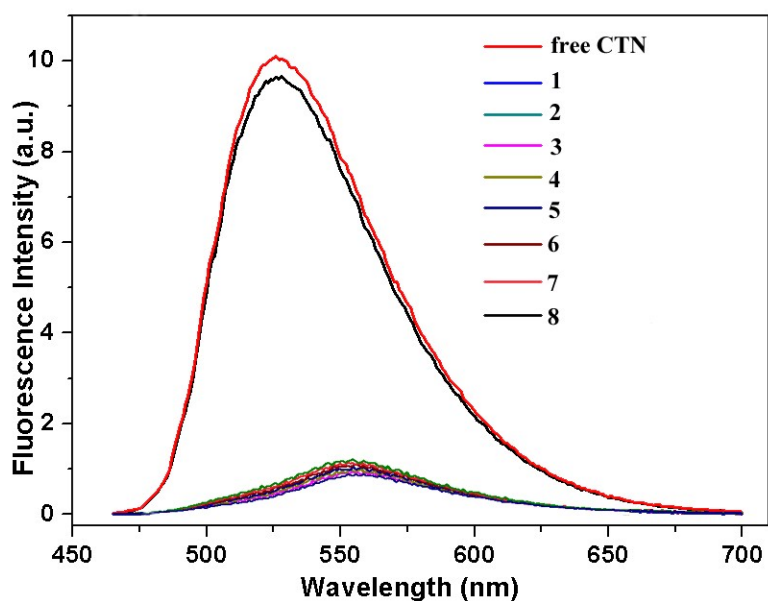

**Fig. S7** Fluorescence emission spectra of CTN in the absence and presence of other chemicals. Note: 1-CTN+Hg<sup>2+</sup> (one equivalent), 2-1 + cyfluthrin, 3-2 + carbofuran, 4-3 + carbendazim, 5-4 + cymperator, 6-5 + H<sub>2</sub>PO<sub>4</sub><sup>-</sup>, 7-6 + HPO<sub>4</sub><sup>2-</sup>, 8-7 + OPs.



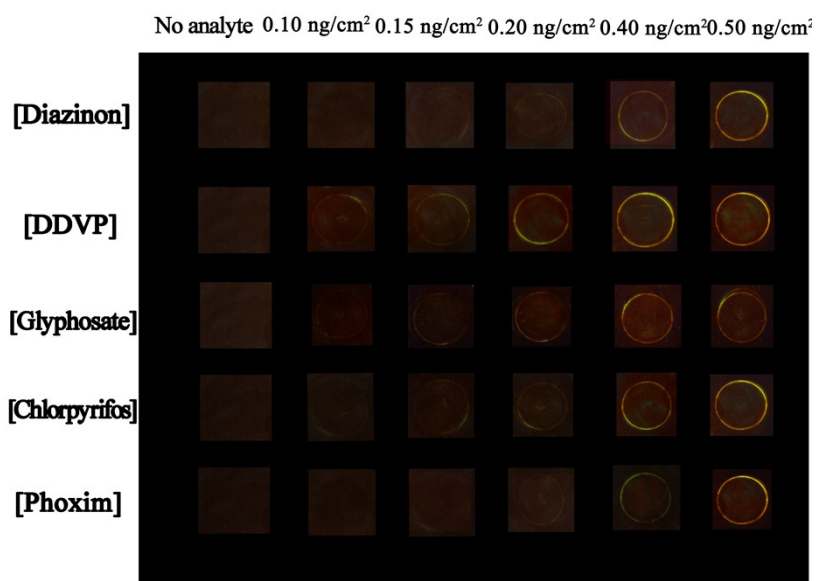

Fig. S8 Picture taken under excitation at 365 nm of a TLC plate, which was pre-treated by the CTN-Hg<sup>2+</sup> complex, upon introduction of different amount of the OPs under test.

Table S1. Comparison of different fluorescent probes for OPs detection.

| Method                                                      | Detection limit (DL) (mg/L) |          |              |          |        | Reference                  |
|-------------------------------------------------------------|-----------------------------|----------|--------------|----------|--------|----------------------------|
|                                                             | Glyphosate                  | DDVP     | Chlorpyrifos | Diazinon | Phoxim |                            |
| Intramolecular Indicator Displacement Assays (IIDAs) sensor | 0.2                         |          |              |          |        | Pavel et al., <sup>1</sup> |
| Quantum dots/bi-enzyme sensor                               |                             | 0.000992 |              |          |        | Tang et al., <sup>2</sup>  |
| QDs-SA-cFLISA sensor                                        |                             |          | 0.0038       |          |        | Ning et al., <sup>3</sup>  |
| This work                                                   | 0.015                       | 0.018    | 0.087        | 0.098    | 0.113  |                            |

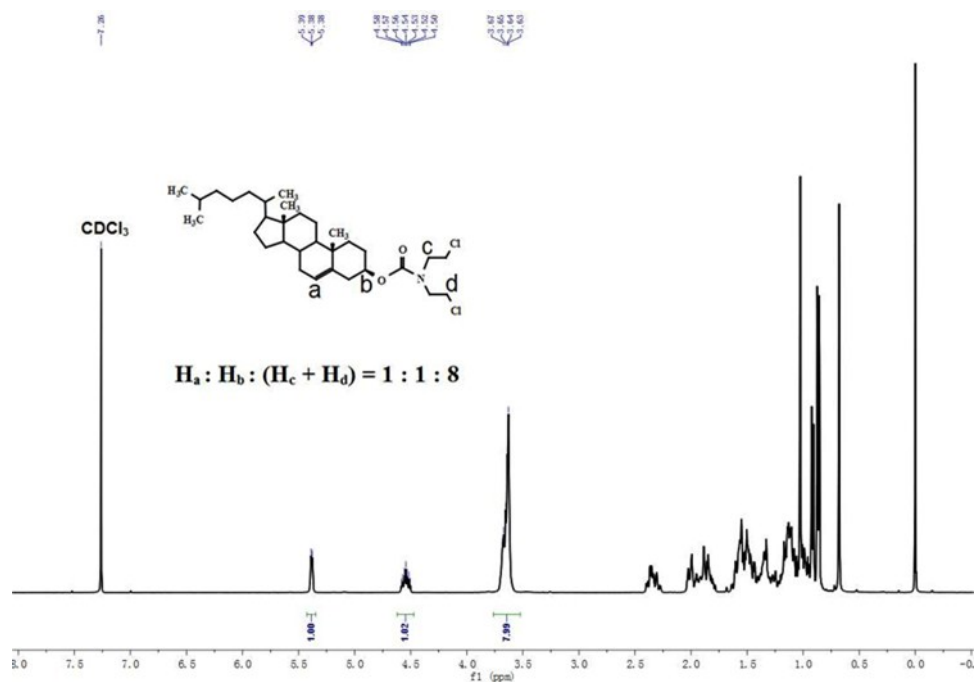

Fig. S9  $^1\text{H}$  NMR spectrum of I-2

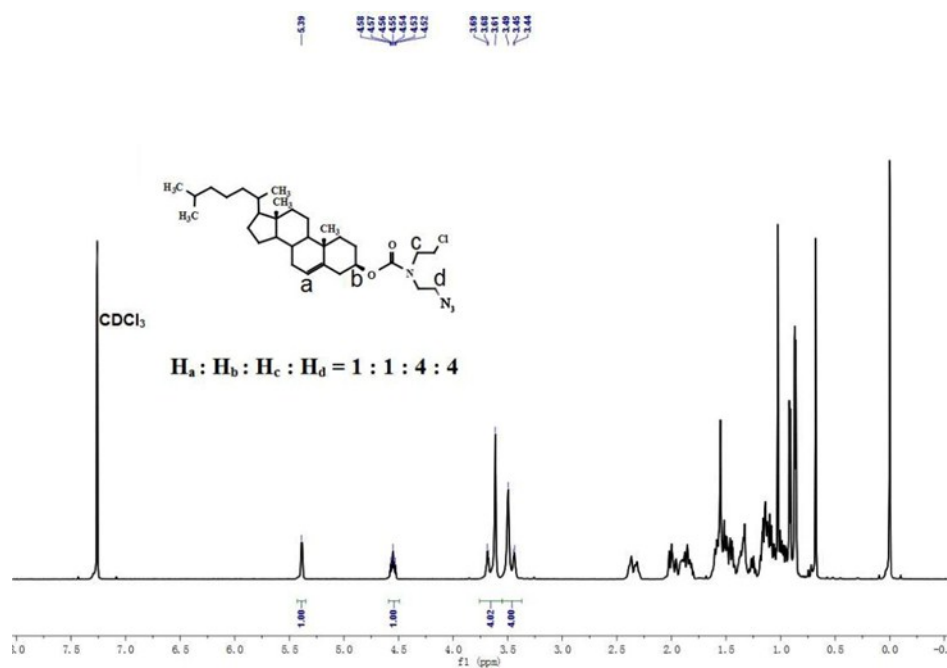

Fig. S10  $^1\text{H}$  NMR spectrum of I-3



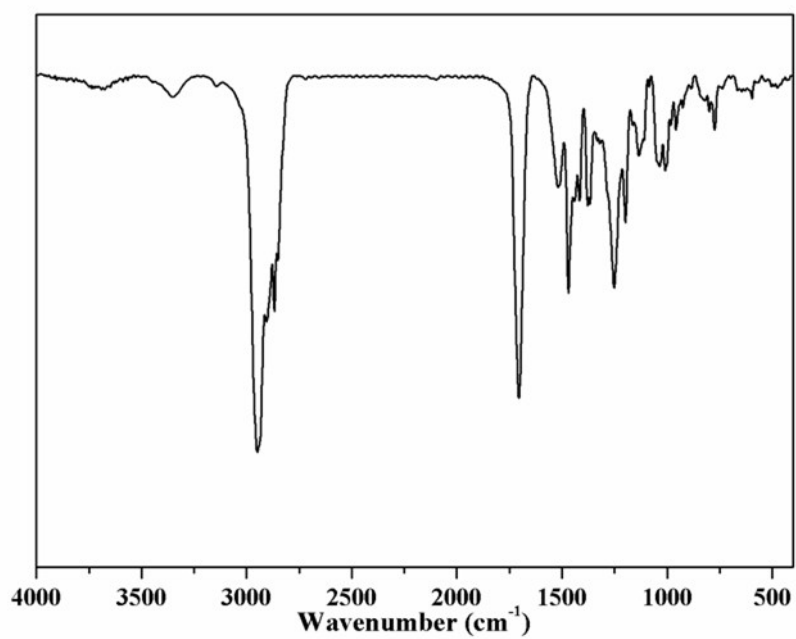

Fig. S13 FT-IR spectrum of I-4

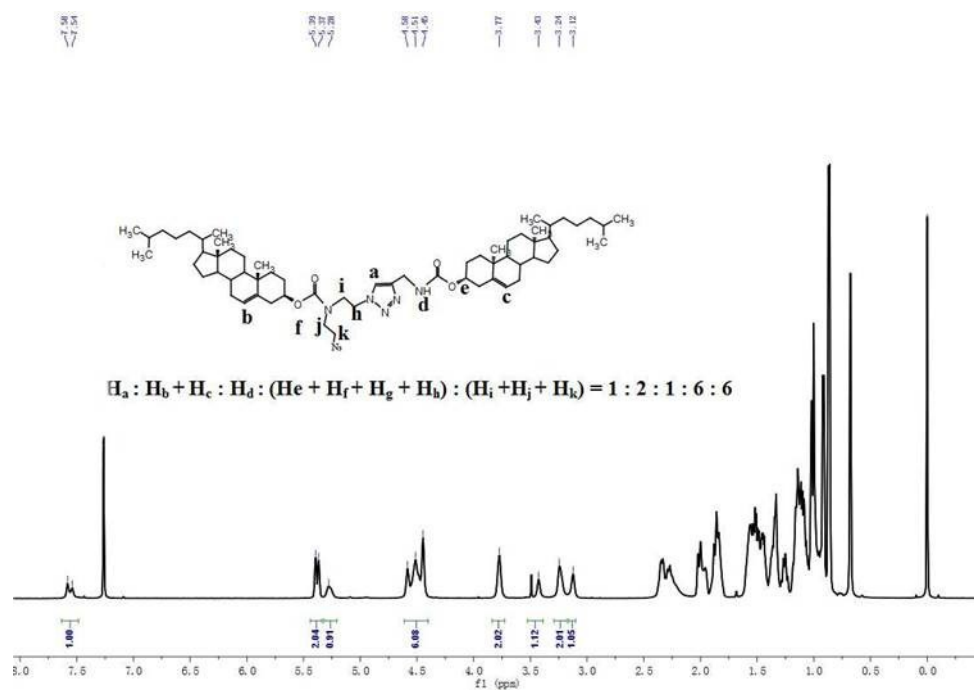

Fig. S14  $^1\text{H}$  NMR spectrum of I-5

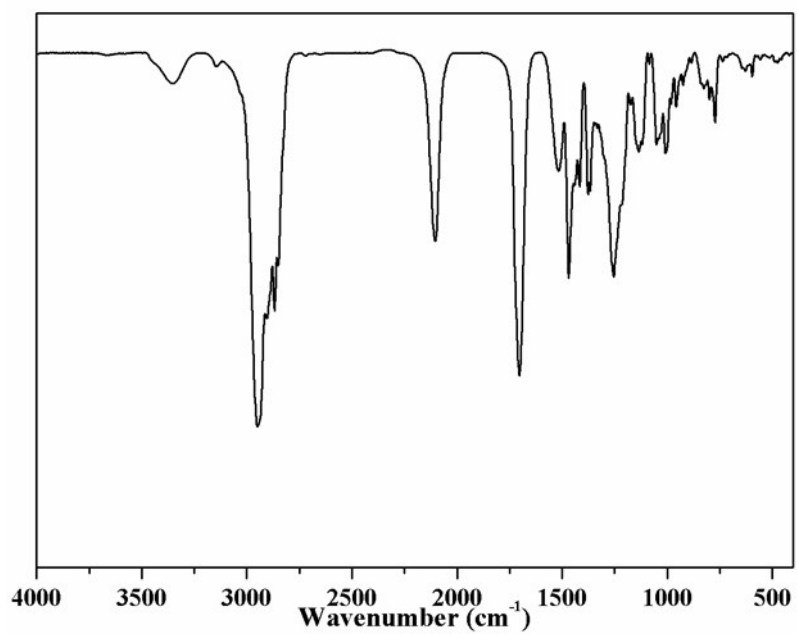

Fig. S15 FT-IR spectrum of I-5

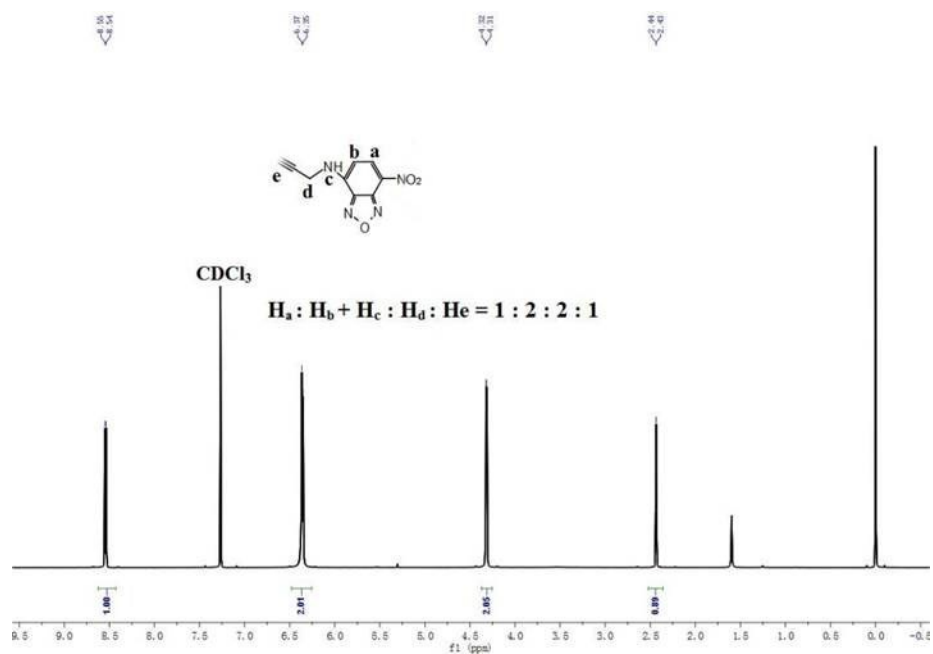

Fig. S16 <sup>1</sup>H NMR spectrum of I-6

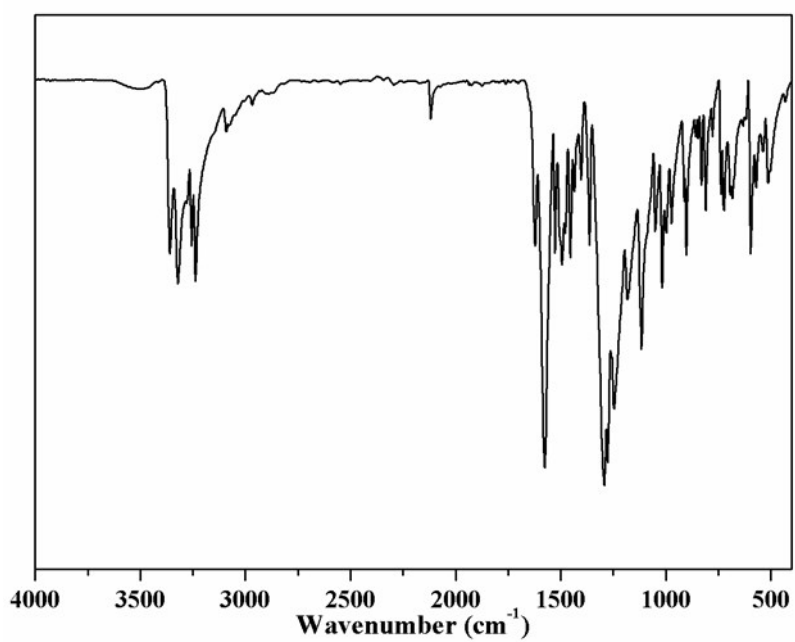

Fig. S17 FT-IR spectrum of I-6

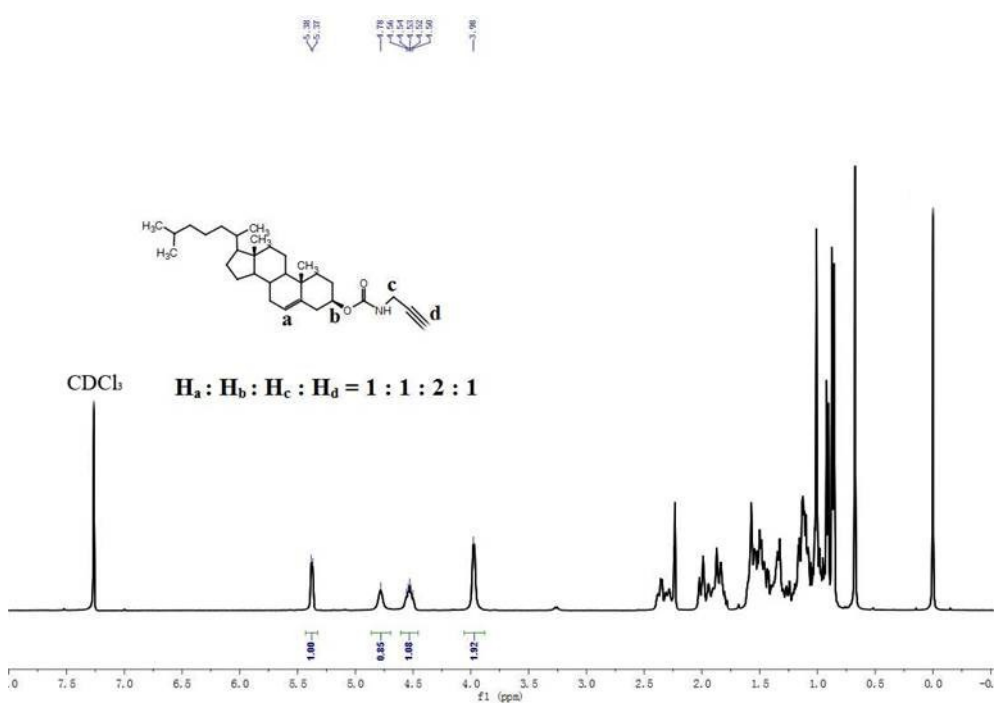

Fig. S18 <sup>1</sup>H NMR spectrum of I-7

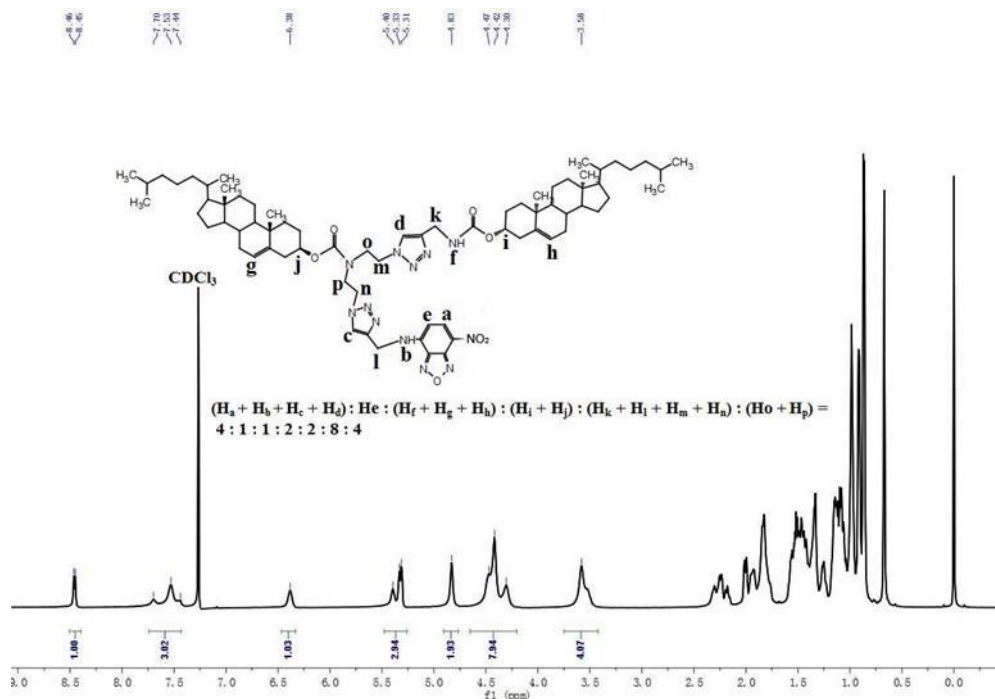

Fig. S19 <sup>1</sup>H NMR spectrum of CTN

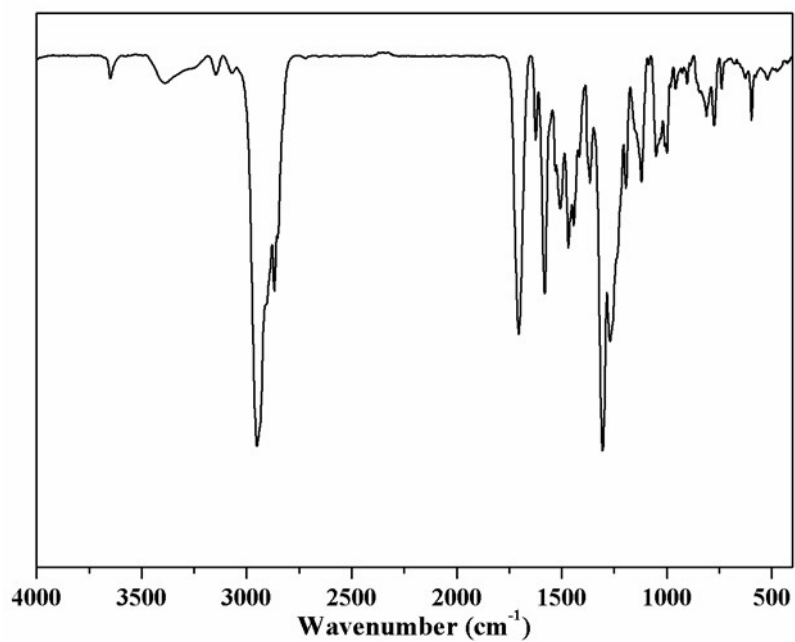

Fig. S20 FT-IR spectrum of CTN

## References:

1. T. Minami, Y. L. Liu, A. Akdeniz, P. Koutnik, N. A. Esipenko, R. Nishiyabu, Y. Kubo, P. A. Jr. *J. Am. Chem. Soc.*, 2014, **136**, 11396-11401.
2. X. W. Meng, J. F. Wei, X. L. Ren, J. Ren, F. Q. Tang, *Biosens. and Bioelectron.*, 2013, **47**, 402-407.
3. Y. P. Chen, H. L. Ren, N. Liu, N. Sai, X. Y. Liu, Z. Liu, Z. X. Gao, B. A. Ning, *J. Agric. Food Chem.*, 2010, **58**, 8895-8903.
